# Supplementary material for: Evolutionary history and functional implications of protein domains and their combinations in eukaryotes
Source: PubMed Central journal article supplement (PMC2394772; doi:10.1186/gb-2007-8-6-r121), 2007-06-25

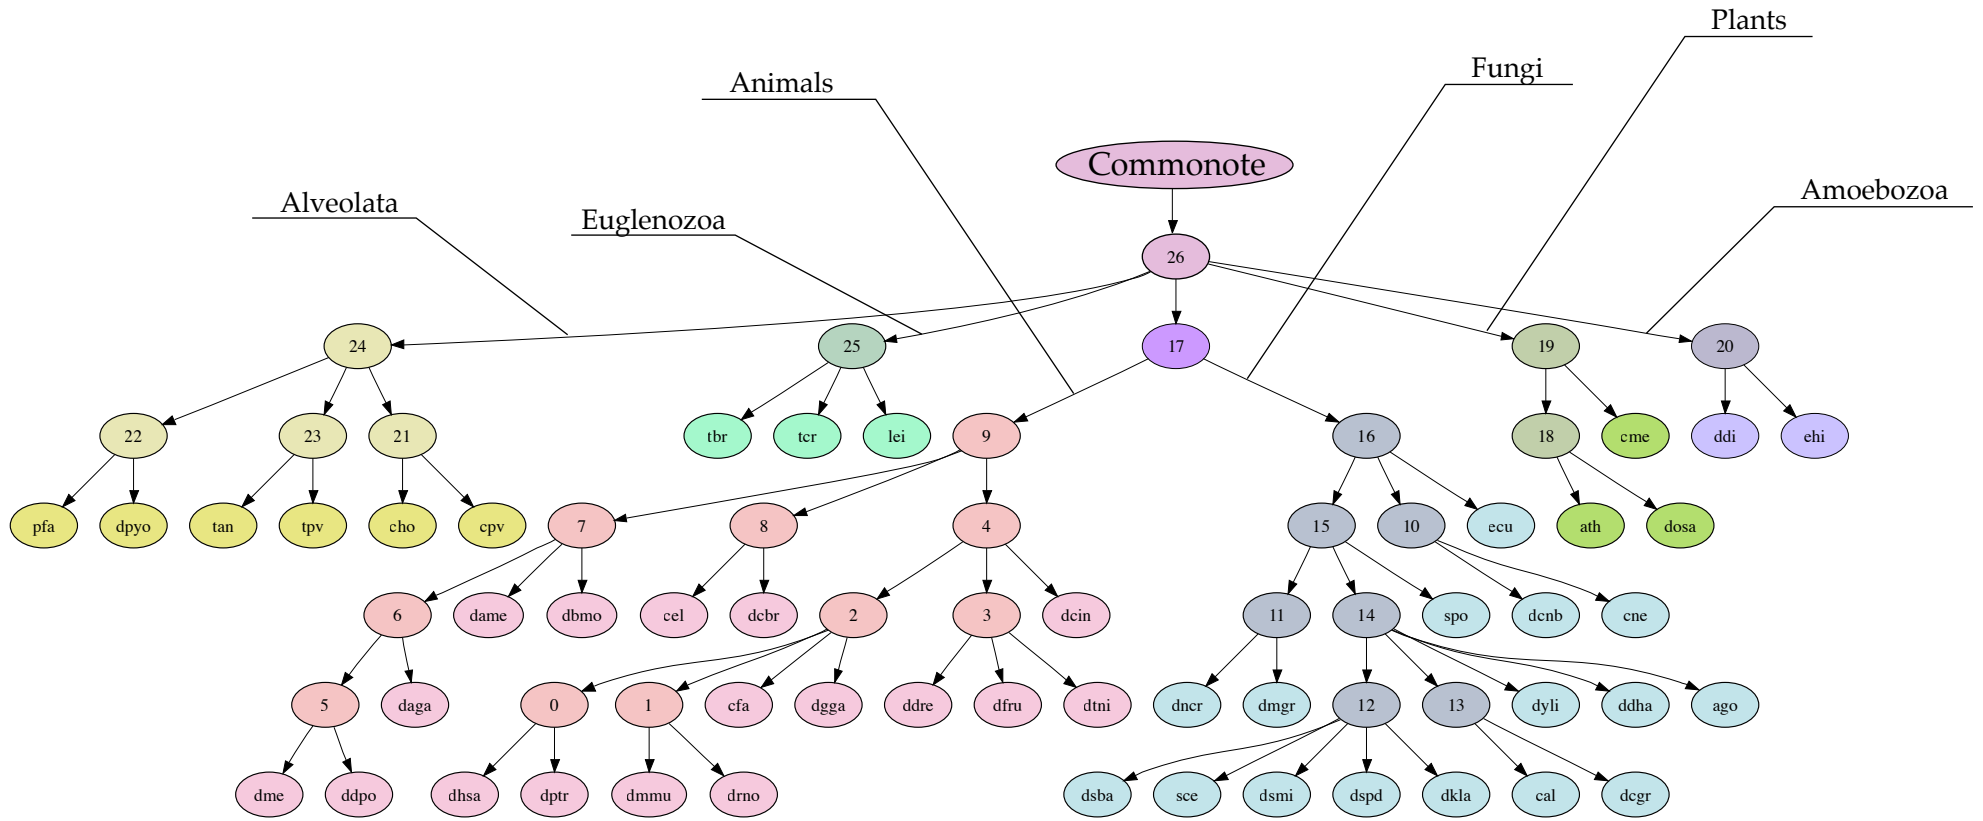

Supplement: gb-2007-8-6-r121-S1.pdf [file gb-2007-8-6-r121-S1.pdf]
